# Supplementary material for: An Inducible Retroviral Expression System for Tandem Affinity Purification Mass-Spectrometry-Based Proteomics Identifies Mixed Lineage Kinase Domain-like Protein (MLKL) as an Heat Shock Protein 90 (HSP90) Client
Source: PubMed Central journal article supplement (PMC4813694; doi:10.1074/mcp.o115.055350), 2015-12-29
Supplement: 10.1074_O115.055350_mcp.O115.055350-2.pdf [file 10.1074_O115.055350_mcp.O115.055350-2.pdf]

**Supplementary Tables for “An inducible retroviral expression system for tandem affinity purification mass-spectrometry-based proteomics identifies MLKL as an HSP90 client”**

Johannes W. Bigenzahn<sup>1,5</sup>, Astrid Fauster<sup>1,5</sup>, Manuele Rebsamen<sup>1</sup>, Richard K. Kandasamy<sup>1</sup>, Stefania Scorzoni<sup>1</sup>, Gregory I. Vladimer<sup>1</sup>, André C. Müller<sup>1</sup>, Matthias Gstaiger<sup>2</sup>, Johannes Zuber<sup>3</sup>, Keiryn L. Bennett<sup>1</sup>, and Giulio Superti-Furga<sup>1,4,\*</sup>

<sup>1</sup>CeMM Research Center for Molecular Medicine of the Austrian Academy of Sciences, Vienna, Austria

<sup>2</sup>Department of Biology, Institute of Molecular Systems Biology, ETH Zürich, Zürich, Switzerland

<sup>3</sup>Research Institute of Molecular Pathology (IMP), Vienna Biocenter (VBC), 1030 Vienna, Austria

<sup>4</sup>Center for Physiology and Pharmacology, Medical University of Vienna, Vienna, Austria

<sup>5</sup>These authors contributed equally to this work.

**Corresponding author:**

Giulio Superti-Furga

CeMM Research Center for Molecular Medicine of the Austrian Academy of Sciences

Lazarettgasse 14, AKH BT25.3

1090 Vienna, Austria

Email: [gsuperti@cemm.oeaw.ac.at](mailto:gsuperti@cemm.oeaw.ac.at)

Telephone: +43 1 40160 70 001

## **Supporting Information**

### **Supplementary Table 1**

SAINT and CRAPome analysis of Ba/F3 rtTA3 NRAS G12D TAP-LC-MSMS.

### **Supplementary Table 2**

SAINT and CRAPome analysis of HT-29 RIEP MLKL S358D TAP-LC-MSMS.

### **Supplementary Table 3**

Protein identification of GFP and NRAS G12D TAP-LC-MSMS in Ba/F3 rtTA3 cells.

### **Supplementary Table 4**

Protein identification of GFP and MLKL S358D TAP-LC-MSMS in HT-29 RIEP cells.

Supplementary Table 1

## SAINT and CRAPome analysis of Ba/F3 rtTA3 NRAS G12D TAP-LC-MSMS

| Column      | Description                                                            |
|-------------|------------------------------------------------------------------------|
| Bait        | SH-tagged bait protein                                                 |
| PreyID      | Identified interactor (UniprotKB ID)                                   |
| PreyName    | Identified interactor (UniprotKB name)                                 |
| AvgSpec     | Average spectral counts of the interactor in two replicate experiments |
| Spec        | Spectral counts of the interactor in two replicate experiments         |
| CtrlCounts  | Spectral counts of the interactor in two replicate control experiments |
| AvgP        | SAINT AvgP score                                                       |
| FoldChange  | Fold change of the interactor compared to control experiments          |
| CrapomeFreq | Frequency of interactor in CRAPome database                            |

| Bait             | PreyID | PreyName | AvgSpec | Spec    | ctrlCounts | AvgP | FoldChange | CrapomeFreq |
|------------------|--------|----------|---------|---------|------------|------|------------|-------------|
| RASN (NRAS G12D) | P08556 | RASN     | 138,5   | 140 137 | 0 0        | 1    | 1385       | 2,9         |
| RASN (NRAS G12D) | Q921Q7 | RIN1     | 10      | 11 9    | 0 0        | 1    | 100        | NA          |
| RASN (NRAS G12D) | Q5SWU9 | ACACA    | 9       | 13 5    | 0 0        | 1    | 90         | 13,1        |
| RASN (NRAS G12D) | P51881 | ADT2     | 7,5     | 7 8     | 0 0        | 1    | 75         | 47,2        |
| RASN (NRAS G12D) | P99024 | TBB5     | 6,5     | 10 3    | 0 0        | 1    | 65         | 91,5        |
| RASN (NRAS G12D) | P50446 | K2C6A    | 5,5     | 6 5     | 0 0        | 1    | 55         | 68,2        |
| RASN (NRAS G12D) | P21107 | TPM3     | 5,5     | 8 3     | 0 0        | 1    | 55         | 26,2        |
| RASN (NRAS G12D) | Q8BGZ7 | K2C75    | 5       | 4 6     | 0 0        | 1    | 50         | 64,4        |
| RASN (NRAS G12D) | Q99MN9 | PCCB     | 5       | 6 4     | 0 0        | 1    | 50         | 16,9        |
| RASN (NRAS G12D) | Q91ZA3 | PCCA     | 4,5     | 7 2     | 0 0        | 1    | 45         | 16,6        |
| RASN (NRAS G12D) | P62908 | RS3      | 4,5     | 7 2     | 0 0        | 1    | 45         | 58,3        |
| RASN (NRAS G12D) | Q9JHG7 | PK3CG    | 4,5     | 5 4     | 0 0        | 1    | 45         | NA          |
| RASN (NRAS G12D) | Q05920 | PYC      | 3,5     | 5 2     | 0 0        | 1    | 35         | 19,8        |
| RASN (NRAS G12D) | P11499 | HS90B    | 3       | 4 2     | 0 0        | 1    | 30         | 61,5        |
| RASN (NRAS G12D) | Q03265 | ATPA     | 3       | 3 3     | 0 0        | 1    | 30         | 42,9        |
| RASN (NRAS G12D) | Q8VED5 | K2C79    | 3       | 3 3     | 0 0        | 1    | 30         | 59,8        |
| RASN (NRAS G12D) | Q791V5 | MTCH2    | 3       | 4 2     | 0 0        | 1    | 30         | 3,2         |
| RASN (NRAS G12D) | P61358 | RL27     | 2,5     | 3 2     | 0 0        | 1    | 25         | 35,3        |
| RASN (NRAS G12D) | P22752 | H2A1     | 2       | 2 2     | 0 0        | 1    | 20         | 60,1        |
| RASN (NRAS G12D) | P62852 | RS25     | 2       | 2 2     | 0 0        | 1    | 20         | 44,9        |
| RASN (NRAS G12D) | Q64523 | H2A2C    | 2       | 2 2     | 0 0        | 1    | 20         | 60,1        |
| RASN (NRAS G12D) | Q6GSS7 | H2A2A    | 2       | 2 2     | 0 0        | 1    | 20         | 60,1        |
| RASN (NRAS G12D) | Q8BFU2 | H2A3     | 2       | 2 2     | 0 0        | 1    | 20         | 60,1        |
| RASN (NRAS G12D) | Q8CGP6 | H2A1H    | 2       | 2 2     | 0 0        | 1    | 20         | 60,1        |
| RASN (NRAS G12D) | Q8R1M2 | H2AJ     | 2       | 2 2     | 0 0        | 1    | 20         | 60,1        |
| RASN (NRAS G12D) | Q8CGP5 | H2A1F    | 2       | 2 2     | 0 0        | 1    | 20         | NA          |
| RASN (NRAS G12D) | Q8CGP7 | H2A1K    | 2       | 2 2     | 0 0        | 1    | 20         | NA          |
| RASN (NRAS G12D) | Q60605 | MYL6     | 7,5     | 8 7     | 1 0        | 1    | 15         | 36,7        |
| RASN (NRAS G12D) | P60710 | ACTB     | 11      | 15 7    | 2 0        | 1    | 11         | 86          |
| RASN (NRAS G12D) | P63260 | ACTG     | 11      | 15 7    | 2 0        | 1    | 11         | 86          |
| RASN (NRAS G12D) | P10126 | EF1A1    | 4,5     | 5 4     | 0 1        | 1    | 9          | 82,2        |
| RASN (NRAS G12D) | Q6NXH9 | K2C73    | 6,5     | 5 8     | 2 0        | 0,99 | 6,5        | 29,2        |
| RASN (NRAS G12D) | Q9CZX8 | RS19     | 2,5     | 3 2     | 1 0        | 0,96 | 5          | 41,4        |
| RASN (NRAS G12D) | Q6IME9 | K2C72    | 2,5     | 2 3     | 0 1        | 0,96 | 5          | 22,7        |
| RASN (NRAS G12D) | P16858 | G3P      | 4       | 3 5     | 1 1        | 0,96 | 4          | 55,4        |
| RASN (NRAS G12D) | Q01853 | TERA     | 5       | 7 3     | 1 2        | 0,84 | 3,33       | 33,5        |
| RASN (NRAS G12D) | P43277 | H13      | 4,5     | 5 4     | 2 2        | 0,73 | 2,25       | 67,9        |
| RASN (NRAS G12D) | P15864 | H12      | 4,5     | 5 4     | 2 2        | 0,73 | 2,25       | 68,2        |
| RASN (NRAS G12D) | Q8VDD5 | MYH9     | 67      | 85 49   | 19 21      | 0,69 | 3,35       | 40,5        |
| RASN (NRAS G12D) | O89023 | TPP1     | 6,5     | 7 6     | 2 4        | 0,59 | 2,17       | 0,6         |
| RASN (NRAS G12D) | Q8BMF4 | ODP2     | 2,5     | 3 2     | 1 2        | 0,52 | 1,67       | 7,3         |
| RASN (NRAS G12D) | Q99KV1 | DJB11    | 2,5     | 3 2     | 2 1        | 0,52 | 1,67       | 7,9         |
| RASN (NRAS G12D) | P68372 | TBB4B    | 5,5     | 11 0    | 0 0        | 0,5  | 55         | 89,8        |
| RASN (NRAS G12D) | P68033 | ACTC     | 5       | 10 0    | 0 0        | 0,5  | 50         | 83,4        |
| RASN (NRAS G12D) | P68134 | ACTS     | 5       | 10 0    | 0 0        | 0,5  | 50         | 83,4        |
| RASN (NRAS G12D) | P68368 | TBA4A    | 5       | 10 0    | 0 0        | 0,5  | 50         | 90,1        |
| RASN (NRAS G12D) | Q9JJZ2 | TBA8     | 5       | 10 0    | 0 0        | 0,5  | 50         | 89,8        |
| RASN (NRAS G12D) | P62751 | RL23A    | 3,5     | 6 1     | 0 0        | 0,5  | 35         | 51,3        |
| RASN (NRAS G12D) | P01837 | IGKC     | 3       | 6 0     | 0 0        | 0,5  | 30         | NA          |
| RASN (NRAS G12D) | P48962 | ADT1     | 3       | 0 6     | 0 0        | 0,5  | 30         | 39,7        |
| RASN (NRAS G12D) | Q9Z331 | K2C6B    | 2,5     | 0 5     | 0 0        | 0,5  | 25         | 77,6        |
| RASN (NRAS G12D) | Q922U2 | K2C5     | 2,5     | 0 5     | 0 0        | 0,5  | 25         | 67,6        |

|                  |        |       |      |       |      |      |      |      |
|------------------|--------|-------|------|-------|------|------|------|------|
| RASN (NRAS G12D) | Q99N57 | RAF1  | 2    | 4 0   | 0 0  | 0,5  | 20   | 0,9  |
| RASN (NRAS G12D) | P08730 | K1C13 | 2    | 4 0   | 0 0  | 0,5  | 20   | 54,8 |
| RASN (NRAS G12D) | P62702 | RS4X  | 2    | 4 0   | 0 0  | 0,5  | 20   | 48,4 |
| RASN (NRAS G12D) | Q61753 | SERA  | 1,5  | 3 0   | 0 0  | 0,5  | 15   | 29,2 |
| RASN (NRAS G12D) | P11983 | TCPA  | 1,5  | 2 1   | 0 0  | 0,5  | 15   | 36,7 |
| RASN (NRAS G12D) | Q01768 | NDKB  | 1,5  | 3 0   | 0 0  | 0,5  | 15   | 27,7 |
| RASN (NRAS G12D) | P14115 | RL27A | 1,5  | 3 0   | 0 0  | 0,5  | 15   | 41,4 |
| RASN (NRAS G12D) | P62270 | RS18  | 1,5  | 3 0   | 0 0  | 0,5  | 15   | 54,5 |
| RASN (NRAS G12D) | P62900 | RL31  | 1,5  | 2 1   | 0 0  | 0,5  | 15   | 36,4 |
| RASN (NRAS G12D) | P35700 | PRDX1 | 1,5  | 2 1   | 0 0  | 0,5  | 15   | 54,2 |
| RASN (NRAS G12D) | Q9ESP1 | SDF2L | 1,5  | 3 0   | 0 0  | 0,5  | 15   | 1,2  |
| RASN (NRAS G12D) | Q9DCH4 | EIF3F | 1    | 2 0   | 0 0  | 0,5  | 10   | 17,8 |
| RASN (NRAS G12D) | Q8BH59 | CMC1  | 1    | 2 0   | 0 0  | 0,5  | 10   | 6,1  |
| RASN (NRAS G12D) | Q61781 | K1C14 | 1    | 0 2   | 0 0  | 0,5  | 10   | 67,1 |
| RASN (NRAS G12D) | P09528 | FRIH  | 1    | 2 0   | 0 0  | 0,5  | 10   | NA   |
| RASN (NRAS G12D) | Q922B2 | SYDC  | 1    | 2 0   | 0 0  | 0,5  | 10   | 23,9 |
| RASN (NRAS G12D) | Q61414 | K1C15 | 1    | 0 2   | 0 0  | 0,5  | 10   | 54,8 |
| RASN (NRAS G12D) | P38647 | GRP75 | 1    | 2 0   | 0 0  | 0,5  | 10   | 69,7 |
| RASN (NRAS G12D) | Q6ZWU9 | RS27  | 1    | 2 0   | 0 0  | 0,5  | 10   | 38,2 |
| RASN (NRAS G12D) | P14131 | RS16  | 1    | 2 0   | 0 0  | 0,5  | 10   | 42,9 |
| RASN (NRAS G12D) | P62274 | RS29  | 1    | 2 0   | 0 0  | 0,5  | 10   | 10,8 |
| RASN (NRAS G12D) | P62281 | RS11  | 1    | 2 0   | 0 0  | 0,5  | 10   | 29,4 |
| RASN (NRAS G12D) | P68040 | GBLP  | 1    | 2 0   | 0 0  | 0,5  | 10   | 21,9 |
| RASN (NRAS G12D) | Q9QWL7 | K1C17 | 1    | 0 2   | 0 0  | 0,5  | 10   | 57,7 |
| RASN (NRAS G12D) | Q9QZD9 | EIF3I | 1    | 2 0   | 0 0  | 0,5  | 10   | 21,6 |
| RASN (NRAS G12D) | Q6ZWY3 | RS27L | 1    | 2 0   | 0 0  | 0,5  | 10   | 33,8 |
| RASN (NRAS G12D) | Q9D5Y0 | CG031 | 1    | 0 2   | 0 0  | 0,5  | 10   | NA   |
| RASN (NRAS G12D) | Q497I4 | KRT35 | 1    | 2 0   | 0 0  | 0,5  | 10   | 42   |
| RASN (NRAS G12D) | Q9DCT5 | SDF2  | 1    | 2 0   | 0 0  | 0,5  | 10   | 0,6  |
| RASN (NRAS G12D) | Q99KP6 | PRP19 | 1    | 2 0   | 0 0  | 0,5  | 10   | 20,4 |
| RASN (NRAS G12D) | P29391 | FRIL1 | 1    | 2 0   | 0 0  | 0,5  | 10   | NA   |
| RASN (NRAS G12D) | Q6IFX2 | K1C42 | 1    | 0 2   | 0 0  | 0,5  | 10   | NA   |
| RASN (NRAS G12D) | P99027 | RLA2  | 3    | 5 1   | 1 0  | 0,5  | 6    | 48,4 |
| RASN (NRAS G12D) | O08638 | MYH11 | 4    | 8 0   | 0 2  | 0,5  | 4    | 28,6 |
| RASN (NRAS G12D) | P04104 | K2C1  | 3    | 6 0   | 2 0  | 0,5  | 3    | 93,3 |
| RASN (NRAS G12D) | P01868 | IGHG1 | 17   | 28 6  | 8 12 | 0,5  | 1,7  | NA   |
| RASN (NRAS G12D) | P01869 | IGH1M | 17   | 28 6  | 8 12 | 0,5  | 1,7  | NA   |
| RASN (NRAS G12D) | P62830 | RL23  | 1,5  | 2 1   | 0 1  | 0,47 | 3    | 51,9 |
| RASN (NRAS G12D) | Q62WV7 | RL35  | 1    | 2 0   | 1 0  | 0,47 | 2    | 34,4 |
| RASN (NRAS G12D) | P05064 | ALDOA | 1,5  | 3 0   | 2 0  | 0,46 | 1,5  | 34,1 |
| RASN (NRAS G12D) | P62806 | H4    | 2,5  | 4 1   | 3 0  | 0,45 | 1,67 | 47,8 |
| RASN (NRAS G12D) | Q3THE2 | ML12B | 3,5  | 4 3   | 2 2  | 0,44 | 1,75 | 30,3 |
| RASN (NRAS G12D) | Q6URW6 | MYH14 | 3    | 5 1   | 2 2  | 0,43 | 1,5  | 22,2 |
| RASN (NRAS G12D) | Q9JIY5 | HTRA2 | 2    | 2 2   | 1 2  | 0,35 | 1,33 | 0,6  |
| RASN (NRAS G12D) | P43274 | H14   | 3    | 3 3   | 2 2  | 0,28 | 1,5  | 68,2 |
| RASN (NRAS G12D) | P05213 | TBA1B | 14,5 | 12 17 | 6 9  | 0,16 | 1,93 | 93,6 |
| RASN (NRAS G12D) | P0CG49 | UBB   | 2    | 1 3   | 2 2  | 0,14 | 1    | 58,3 |
| RASN (NRAS G12D) | P0CG50 | UBC   | 2    | 1 3   | 2 2  | 0,14 | 1    | 58,3 |
| RASN (NRAS G12D) | P62983 | RS27A | 2    | 1 3   | 2 2  | 0,14 | 1    | 62,1 |
| RASN (NRAS G12D) | P62984 | RL40  | 2    | 1 3   | 2 2  | 0,14 | 1    | 58,9 |
| RASN (NRAS G12D) | Q07797 | LG3BP | 4    | 4 4   | 2 5  | 0,01 | 1,14 | 4,7  |
| RASN (NRAS G12D) | P10518 | HEM2  | 1    | 1 1   | 0 0  | 0    | 10   | NA   |
| RASN (NRAS G12D) | P67984 | RL22  | 1    | 1 1   | 0 0  | 0    | 10   | 38,8 |
| RASN (NRAS G12D) | P62267 | RS23  | 1    | 1 1   | 0 0  | 0    | 10   | 31,2 |
| RASN (NRAS G12D) | Q9CXW4 | RL11  | 1    | 1 1   | 0 0  | 0    | 10   | 43,1 |
| RASN (NRAS G12D) | Q9CR62 | M2OM  | 1    | 1 1   | 0 0  | 0    | 10   | 7,6  |
| RASN (NRAS G12D) | Q3TCN2 | PLBL2 | 1    | 1 1   | 0 0  | 0    | 10   | 0,6  |
| RASN (NRAS G12D) | Q8VBV7 | CSN8  | 1    | 1 1   | 0 0  | 0    | 10   | 3,8  |
| RASN (NRAS G12D) | P63276 | RS17  | 0,5  | 1 0   | 0 0  | 0    | 5    | 34,7 |
| RASN (NRAS G12D) | P17809 | GTR1  | 0,5  | 1 0   | 0 0  | 0    | 5    | 2,9  |
| RASN (NRAS G12D) | P34884 | MIF   | 0,5  | 0 1   | 0 0  | 0    | 5    | 0,3  |
| RASN (NRAS G12D) | P34884 | MIF   | 0,5  | 0 1   | 0 0  | 0    | 5    | 7,9  |
| RASN (NRAS G12D) | Q9JKB3 | YBOX3 | 0,5  | 1 0   | 0 0  | 0    | 5    | 41,7 |
| RASN (NRAS G12D) | P35979 | RL12  | 0,5  | 1 0   | 0 0  | 0    | 5    | 40,8 |
| RASN (NRAS G12D) | Q91VR2 | ATPG  | 0,5  | 1 0   | 0 0  | 0    | 5    | 9,6  |
| RASN (NRAS G12D) | Q99KQ4 | NAMPT | 0,5  | 1 0   | 0 0  | 0    | 5    | 5,8  |
| RASN (NRAS G12D) | P80318 | TCPG  | 0,5  | 1 0   | 0 0  | 0    | 5    | 33,5 |
| RASN (NRAS G12D) | P61982 | 1433G | 0,5  | 1 0   | 0 0  | 0    | 5    | 22,4 |

|                  |        |       |     |       |       |   |      |      |
|------------------|--------|-------|-----|-------|-------|---|------|------|
| RASN (NRAS G12D) | P62301 | RS13  | 0,5 | 1 0   | 0 0   | 0 | 5    | 35   |
| RASN (NRAS G12D) | Q9JJ18 | RL38  | 0,5 | 0 1   | 0 0   | 0 | 5    | 32,1 |
| RASN (NRAS G12D) | P62960 | YBOX1 | 0,5 | 1 0   | 0 0   | 0 | 5    | 53,6 |
| RASN (NRAS G12D) | Q8VEK3 | HNRPU | 0,5 | 1 0   | 0 0   | 0 | 5    | 61,8 |
| RASN (NRAS G12D) | Q99MN1 | SYK   | 0,5 | 1 0   | 0 0   | 0 | 5    | 12,8 |
| RASN (NRAS G12D) | O54941 | SMCE1 | 0,5 | 1 0   | 0 0   | 0 | 5    | 3,8  |
| RASN (NRAS G12D) | Q78IK2 | USMG5 | 0,5 | 1 0   | 0 0   | 0 | 5    | 0,6  |
| RASN (NRAS G12D) | Q99JR1 | SFXN1 | 0,5 | 1 0   | 0 0   | 0 | 5    | 5    |
| RASN (NRAS G12D) | Q9Z2C8 | YBOX2 | 0,5 | 1 0   | 0 0   | 0 | 5    | 40,5 |
| RASN (NRAS G12D) | P52480 | KPYM  | 7   | 8 6   | 6 6   | 0 | 1,17 | 52,8 |
| RASN (NRAS G12D) | P61514 | RL37A | 1   | 1 1   | 2 0   | 0 | 1    | 21,3 |
| RASN (NRAS G12D) | P63017 | HSP7C | 21  | 23 19 | 29 30 | 0 | 0,71 | 95,6 |
| RASN (NRAS G12D) | O35658 | C1QBP | 0,5 | 1 0   | 1 1   | 0 | 0,5  | 48,1 |
| RASN (NRAS G12D) | P18524 | HVM53 | 1   | 1 1   | 2 3   | 0 | 0,4  | NA   |
| RASN (NRAS G12D) | P18526 | HVM55 | 1   | 1 1   | 2 3   | 0 | 0,4  | NA   |
| RASN (NRAS G12D) | P20029 | GRP78 | 2,5 | 5 0   | 7 7   | 0 | 0,36 | 85,1 |

Supplementary Table 2

## SAINT and CRAPome analysis of HT-29 RIEP MLKL S358D TAP-LC-MSMS

| Column      | Description                                                            |
|-------------|------------------------------------------------------------------------|
| Bait        | SH-tagged bait protein                                                 |
| PreyID      | Identified interactor (UniprotKB ID)                                   |
| PreyName    | Identified interactor (UniprotKB name)                                 |
| AvgSpec     | Average spectral counts of the interactor in two replicate experiments |
| Spec        | Spectral counts of the interactor in two replicate experiments         |
| CtrlCounts  | Spectral counts of the interactor in two replicate control experiments |
| AvgP        | SAINT AvgP score                                                       |
| FoldChange  | Fold change of the interactor compared to control experiments          |
| CrapomeFreq | Frequency of interactor in CRAPome database                            |

| Bait              | PreyID | PreyName | AvgSpec | Spec    | ctrlCounts | AvgP | FoldChange | CrapomeFreq |
|-------------------|--------|----------|---------|---------|------------|------|------------|-------------|
| MLKL (MLKL S358D) | Q8NB16 | MLKL     | 573     | 537 609 | 0 2        | 1    | 573        | 0,3         |
| MLKL (MLKL S358D) | P54652 | HSP72    | 35,5    | 33 38   | 0 0        | 1    | 355        | 92,7        |
| MLKL (MLKL S358D) | P08238 | HS90B    | 18,5    | 14 23   | 0 0        | 1    | 185        | 61,5        |
| MLKL (MLKL S358D) | P07900 | HS90A    | 12,5    | 10 15   | 0 0        | 1    | 125        | 60,1        |
| MLKL (MLKL S358D) | Q16543 | CDC37    | 5       | 5 5     | 0 0        | 1    | 50         | 11,1        |
| MLKL (MLKL S358D) | Q92598 | HS105    | 4       | 4 4     | 0 0        | 1    | 40         | 17,5        |
| MLKL (MLKL S358D) | Q13085 | ACACA    | 4,5     | 2 7     | 0 0        | 0,99 | 45         | 13,1        |
| MLKL (MLKL S358D) | Q9Y572 | RIPK3    | 16,5    | 14 19   | 0 4        | 0,98 | 8,25       | NA          |
| MLKL (MLKL S358D) | P08779 | K1C16    | 2       | 0 4     | 0 0        | 0,5  | 20         | 64,1        |
| MLKL (MLKL S358D) | Q58FF8 | H90B2    | 2       | 0 4     | 0 0        | 0,5  | 20         | NA          |
| MLKL (MLKL S358D) | Q9H254 | SPTN4    | 2       | 0 4     | 0 0        | 0,5  | 20         | 5,2         |
| MLKL (MLKL S358D) | Q8NCM8 | DYHC2    | 1,5     | 0 3     | 0 0        | 0,5  | 15         | 0,6         |
| MLKL (MLKL S358D) | P30048 | PRDX3    | 1,5     | 1 2     | 0 0        | 0,49 | 15         | 22,7        |
| MLKL (MLKL S358D) | O00294 | TULP1    | 1       | 0 2     | 0 0        | 0,49 | 10         | 0,3         |
| MLKL (MLKL S358D) | P08708 | RS17     | 1       | 0 2     | 0 0        | 0,49 | 10         | 34,7        |
| MLKL (MLKL S358D) | P0CW22 | RS17L    | 1       | 0 2     | 0 0        | 0,49 | 10         | 34,7        |
| MLKL (MLKL S358D) | P62280 | RS11     | 1       | 0 2     | 0 0        | 0,49 | 10         | 29,4        |
| MLKL (MLKL S358D) | Q5M9N0 | CD158    | 1       | 2 0     | 0 0        | 0,49 | 10         | 0,6         |
| MLKL (MLKL S358D) | P35527 | K1C9     | 2       | 0 4     | 2 0        | 0,4  | 2          | 81,9        |
| MLKL (MLKL S358D) | P02533 | K1C14    | 2,5     | 0 5     | 0 3        | 0,36 | 1,67       | 67,1        |
| MLKL (MLKL S358D) | Q08380 | LG3BP    | 2       | 2 2     | 0 2        | 0,35 | 2          | 4,7         |
| MLKL (MLKL S358D) | P55072 | TERA     | 2       | 1 3     | 2 0        | 0,31 | 2          | 33,5        |
| MLKL (MLKL S358D) | P68104 | EF1A1    | 1,5     | 0 3     | 1 1        | 0,3  | 1,5        | 82,2        |
| MLKL (MLKL S358D) | Q05639 | EF1A2    | 1,5     | 0 3     | 1 1        | 0,3  | 1,5        | 80,2        |
| MLKL (MLKL S358D) | Q5VTE0 | EF1A3    | 1,5     | 0 3     | 1 1        | 0,3  | 1,5        | NA          |
| MLKL (MLKL S358D) | Q9UBS4 | DJB11    | 4       | 4 4     | 2 2        | 0,17 | 2          | 7,9         |
| MLKL (MLKL S358D) | P19013 | K2C4     | 1       | 0 2     | 0 2        | 0,17 | 1          | 45,5        |
| MLKL (MLKL S358D) | P05387 | RLA2     | 1       | 0 2     | 1 1        | 0,14 | 1          | 48,4        |
| MLKL (MLKL S358D) | P02538 | K2C6A    | 2       | 0 4     | 1 4        | 0,02 | 0,8        | 68,2        |
| MLKL (MLKL S358D) | P48668 | K2C6C    | 2       | 0 4     | 1 4        | 0,02 | 0,8        | 68,2        |
| MLKL (MLKL S358D) | P04259 | K2C6B    | 1,5     | 0 3     | 1 4        | 0,01 | 0,6        | 77,6        |
| MLKL (MLKL S358D) | P11142 | HSP7C    | 55      | 53 57   | 80 66      | 0    | 0,75       | 95,6        |
| MLKL (MLKL S358D) | P08107 | HSP71    | 28,5    | 28 29   | 41 34      | 0    | 0,76       | 95,6        |
| MLKL (MLKL S358D) | P17066 | HSP76    | 25      | 26 24   | 32 30      | 0    | 0,81       | 91,3        |
| MLKL (MLKL S358D) | P34931 | HS71L    | 21      | 19 23   | 26 26      | 0    | 0,81       | 93,9        |
| MLKL (MLKL S358D) | P11021 | GRP78    | 17,5    | 17 18   | 25 26      | 0    | 0,69       | 85,1        |
| MLKL (MLKL S358D) | P68363 | TBA1B    | 15      | 17 13   | 20 14      | 0    | 0,88       | 93,6        |
| MLKL (MLKL S358D) | P07437 | TBB5     | 11      | 8 14    | 14 7       | 0    | 1,05       | 91,5        |
| MLKL (MLKL S358D) | P62829 | RL23     | 9       | 11 7    | 7 8        | 0    | 1,2        | 51,9        |
| MLKL (MLKL S358D) | P68366 | TBA4A    | 8       | 8 8     | 15 10      | 0    | 0,64       | 90,1        |
| MLKL (MLKL S358D) | P68371 | TBB4B    | 7,5     | 4 11    | 11 5       | 0    | 0,94       | 89,8        |
| MLKL (MLKL S358D) | P13645 | K1C10    | 6,5     | 0 13    | 4 22       | 0    | 0,5        | 86,6        |
| MLKL (MLKL S358D) | P0CG47 | UBB      | 5       | 6 4     | 16 14      | 0    | 0,33       | 58,3        |
| MLKL (MLKL S358D) | P0CG48 | UBC      | 5       | 6 4     | 16 14      | 0    | 0,33       | 58,3        |
| MLKL (MLKL S358D) | P62979 | RS27A    | 5       | 6 4     | 16 14      | 0    | 0,33       | 62,1        |
| MLKL (MLKL S358D) | P62987 | RL40     | 5       | 6 4     | 16 14      | 0    | 0,33       | 58,9        |
| MLKL (MLKL S358D) | P38646 | GRP75    | 4       | 4 4     | 10 8       | 0    | 0,44       | 69,7        |
| MLKL (MLKL S358D) | P04264 | K2C1     | 3,5     | 0 7     | 4 9        | 0    | 0,54       | 93,3        |
| MLKL (MLKL S358D) | P35908 | K22E     | 1,5     | 0 3     | 1 9        | 0    | 0,3        | 86,9        |
| MLKL (MLKL S358D) | O14773 | TPP1     | 1       | 1 1     | 1 1        | 0    | 1          | 0,6         |
| MLKL (MLKL S358D) | P05787 | K2C8     | 1       | 0 2     | 2 4        | 0    | 0,33       | 51,9        |

|                   |        |       |     |     |     |   |      |      |
|-------------------|--------|-------|-----|-----|-----|---|------|------|
| MLKL (MLKL S358D) | P35030 | TRY3  | 1   | 1 1 | 0 0 | 0 | 10   | 16,3 |
| MLKL (MLKL S358D) | P46782 | RS5   | 1   | 1 1 | 0 0 | 0 | 10   | 32,7 |
| MLKL (MLKL S358D) | P52597 | HNRPF | 1   | 1 1 | 0 0 | 0 | 10   | 51,3 |
| MLKL (MLKL S358D) | P61247 | RS3A  | 1   | 1 1 | 0 0 | 0 | 10   | 41,1 |
| MLKL (MLKL S358D) | P61978 | HNRPK | 1   | 1 1 | 0 0 | 0 | 10   | 64,1 |
| MLKL (MLKL S358D) | P62913 | RL11  | 1   | 1 1 | 0 0 | 0 | 10   | 43,1 |
| MLKL (MLKL S358D) | Q06830 | PRDX1 | 1   | 1 1 | 0 0 | 0 | 10   | 54,2 |
| MLKL (MLKL S358D) | Q12931 | TRAP1 | 1   | 1 1 | 0 0 | 0 | 10   | 15,2 |
| MLKL (MLKL S358D) | Q14257 | RCN2  | 1   | 1 1 | 0 0 | 0 | 10   | 27,1 |
| MLKL (MLKL S358D) | O43390 | HNRPR | 0,5 | 1 0 | 0 0 | 0 | 5    | 37,6 |
| MLKL (MLKL S358D) | O43464 | HTRA2 | 0,5 | 0 1 | 2 2 | 0 | 0,25 | 0,6  |
| MLKL (MLKL S358D) | O60884 | DNJA2 | 0,5 | 0 1 | 0 0 | 0 | 5    | 16,6 |
| MLKL (MLKL S358D) | P05141 | ADT2  | 0,5 | 0 1 | 2 0 | 0 | 0,5  | 47,2 |
| MLKL (MLKL S358D) | P05161 | ISG15 | 0,5 | 0 1 | 0 0 | 0 | 5    | 1,5  |
| MLKL (MLKL S358D) | P07355 | ANXA2 | 0,5 | 0 1 | 0 0 | 0 | 5    | 26,2 |
| MLKL (MLKL S358D) | P12235 | ADT1  | 0,5 | 0 1 | 2 0 | 0 | 0,5  | 39,7 |
| MLKL (MLKL S358D) | P12236 | ADT3  | 0,5 | 0 1 | 2 0 | 0 | 0,5  | 41,4 |
| MLKL (MLKL S358D) | P13647 | K2C5  | 0,5 | 0 1 | 1 0 | 0 | 1    | 67,6 |
| MLKL (MLKL S358D) | P14618 | KPYM  | 0,5 | 1 0 | 0 0 | 0 | 5    | 52,8 |
| MLKL (MLKL S358D) | P23396 | RS3   | 0,5 | 0 1 | 0 0 | 0 | 5    | 58,3 |
| MLKL (MLKL S358D) | P35232 | PHB   | 0,5 | 0 1 | 0 0 | 0 | 5    | 16,9 |
| MLKL (MLKL S358D) | P51784 | UBP11 | 0,5 | 0 1 | 0 0 | 0 | 5    | 4,1  |
| MLKL (MLKL S358D) | P61513 | RL37A | 0,5 | 0 1 | 0 0 | 0 | 5    | 21,3 |
| MLKL (MLKL S358D) | P62249 | RS16  | 0,5 | 0 1 | 0 0 | 0 | 5    | 42,9 |
| MLKL (MLKL S358D) | P62854 | RS26  | 0,5 | 0 1 | 0 0 | 0 | 5    | 29,7 |
| MLKL (MLKL S358D) | P63208 | SKP1  | 0,5 | 0 1 | 0 0 | 0 | 5    | 27,7 |
| MLKL (MLKL S358D) | Q9H0C2 | ADT4  | 0,5 | 0 1 | 0 0 | 0 | 5    | 34,4 |

Supplementary Table 3

Protein identification of GFP and NRAS G12D TAP-LC-MSMS in Ba/F3 rtTA3 cells

Column Description  
 UniProtID UniProtKB ID  
 Entry\_name UniProtKB entry name  
 Gene\_names UniProtKB entry derived gene names  
 AvgSeqCov Average sequence coverage in two technical replicates  
 AvgSpecCount Average spectral counts in two technical replicates  
 AvgPepCount Average peptide counts in two technical replicates

GFP TAP-LC-MSMS in Ba/F3 rtTA3 cells, 1st biological replicate

| UniProtID | Entry_name  | Gene_names           | AvgSeqCov | AvgSpecCount | AvgPepCount |
|-----------|-------------|----------------------|-----------|--------------|-------------|
| O08638    | MYH11_MOUSE | Myh11                | 1         | 2            | 2           |
| O35658    | C1QB1_MOUSE | C1qbp Gc1qbp         | 5         | 1,5          | 1           |
| O89023    | TPP1_MOUSE  | Tpp1 Cin2            | 8         | 4            | 2,5         |
| P01868    | IGHG1_MOUSE | Ighg1 Igh-4          | 19        | 12,5         | 5,5         |
| P01869    | IGH1M_MOUSE | Ighg1 Igh-4          | 15        | 12,5         | 5,5         |
| P05213    | TBA1B_MOUSE | Tuba1b Tuba2         | 18        | 9,5          | 5,5         |
| POCG49    | UBB_MOUSE   | Ubb                  | 21        | 2            | 1           |
| POCG50    | UBC_MOUSE   | Ubc                  | 20        | 2            | 1           |
| P10126    | EF1A1_MOUSE | Eef1a1 Eef1a         | 2         | 1            | 1           |
| P15864    | H12_MOUSE   | Hist1h1c H1f2        | 11        | 2            | 2           |
| P16627    | HS71L_MOUSE | Hspa11 Hsc70t        | 6         | 5            | 3           |
| P16858    | G3P_MOUSE   | Gapdh Gapd           | 4         | 1            | 1           |
| P18524    | HVM53_MOUSE |                      | 9         | 3            | 1           |
| P18526    | HVM55_MOUSE |                      | 9         | 3            | 1           |
| P20029    | GRP78_MOUSE | Hspa5 Grp78          | 11        | 7            | 5           |
| P43274    | H14_MOUSE   | Hist1h1e H1f4        | 11        | 2            | 2           |
| P43277    | H13_MOUSE   | Hist1h1d H1f3        | 10        | 2            | 2           |
| P52480    | KPYM_MOUSE  | Pkm Pk3 Pkm2 Pykm    | 13        | 6,5          | 5,5         |
| P62631    | EF1A2_MOUSE | Eef1a2 Eef1a1 Stn    | 2         | 1            | 1           |
| P62830    | RL23_MOUSE  | Rpl23                | 14        | 1,5          | 1           |
| P62983    | RS27A_MOUSE | Rps27a Uba80 Ubcep1  | 10        | 2            | 1           |
| P62984    | RL40_MOUSE  | Uba52 Ubcep2         | 12        | 2            | 1           |
| P63017    | HSP7C_MOUSE | Hspa8 Hsc70 Hsc73    | 27        | 30           | 12          |
| Q01853    | TERA_MOUSE  | Vcp                  | 4         | 2,5          | 2,5         |
| Q07797    | LG3BP_MOUSE | Lgals3bp Cypap Mama  | 8         | 5            | 3           |
| Q3THE2    | ML12B_MOUSE | Myl12b Mr1c2 Mylc2b  | 6         | 2            | 1           |
| Q64467    | G3PT_MOUSE  | Gapdhs Gapd-s Gapds  | 3         | 1            | 1           |
| Q616G8    | HECW2_MOUSE | Hecw2 Kiaa1301 Nedl2 | 2         | 2            | 2           |
| QBIME9    | K2C72_MOUSE | Krt72 Krt35 Krt72-ps | 2         | 1            | 1           |
| Q6URW6    | MYH14_MOUSE | Myh14                | 1         | 2            | 2           |
| Q8BMF4    | ODP2_MOUSE  | Dlat                 | 3         | 2,5          | 1,5         |
| Q8VDD5    | MYH9_MOUSE  | Myh9                 | 11        | 21           | 14,5        |
| Q99KV1    | DJB11_MOUSE | Dnajb11              | 3         | 1            | 1           |
| Q9JIY5    | HTRA2_MOUSE | Htra2 Omi Prss25     | 5         | 2            | 2           |

GFP TAP-LC-MSMS in Ba/F3 rtTA3 cells, 2nd biological replicate

| UniProtID | Entry_name  | Gene_names                                                                                                                                | AvgSeqCov | AvgSpecCount | AvgPepCount |
|-----------|-------------|-------------------------------------------------------------------------------------------------------------------------------------------|-----------|--------------|-------------|
| O35658    | C1QB1_MOUSE | C1qbp Gc1qbp                                                                                                                              | 5         | 1,5          | 1           |
| O89023    | TPP1_MOUSE  | Tpp1 Cin2                                                                                                                                 | 6         | 2,5          | 2           |
| P01868    | IGHG1_MOUSE | Ighg1 Igh-4                                                                                                                               | 11        | 8            | 3,5         |
| P01869    | IGH1M_MOUSE | Ighg1 Igh-4                                                                                                                               | 9         | 8            | 3,5         |
| P04104    | K2C1_MOUSE  | Krt1 Krt2-1                                                                                                                               | 4         | 2            | 2           |
| P05064    | ALDOA_MOUSE | Aldoa Aldo1                                                                                                                               | 6         | 2            | 2           |
| P05213    | TBA1B_MOUSE | Tuba1b Tuba2                                                                                                                              | 14        | 6            | 4,5         |
| POCG49    | UBB_MOUSE   | Ubb                                                                                                                                       | 21        | 2            | 1           |
| POCG50    | UBC_MOUSE   | Ubc                                                                                                                                       | 20        | 2            | 1           |
| P15864    | H12_MOUSE   | Hist1h1c H1f2                                                                                                                             | 11        | 2,5          | 2           |
| P16858    | G3P_MOUSE   | Gapdh Gapd                                                                                                                                | 4         | 1            | 1           |
| P18524    | HVM53_MOUSE |                                                                                                                                           | 9         | 2,5          | 1           |
| P18526    | HVM55_MOUSE |                                                                                                                                           | 9         | 2,5          | 1           |
| P20029    | GRP78_MOUSE | Hspa5 Grp78                                                                                                                               | 11        | 7            | 5           |
| P43274    | H14_MOUSE   | Hist1h1e H1f4                                                                                                                             | 11        | 2            | 2           |
| P43276    | H15_MOUSE   | Hist1h1b H1f5                                                                                                                             | 5         | 1            | 1           |
| P43277    | H13_MOUSE   | Hist1h1d H1f3                                                                                                                             | 10        | 2,5          | 2           |
| P52480    | KPYM_MOUSE  | Pkm Pk3 Pkm2 Pykm                                                                                                                         | 12        | 6            | 5           |
| P60710    | ACTB_MOUSE  | Actb                                                                                                                                      | 8         | 2            | 2           |
| P61514    | RL37A_MOUSE | Rpl37a                                                                                                                                    | 37        | 2            | 2           |
| P62806    | H4_MOUSE    | Hist1h4a; Hist1h4b H4-53; Hist1h4c H4-12; Hist1h4d; Hist1h4f; Hist1h4h; Hist1h4i; Hist1h4j; Hist1h4k; Hist1h4m; Hist2h4a Hist2h4; Hist4h4 | 23        | 3            | 2,5         |
| P62983    | RS27A_MOUSE | Rps27a Uba80 Ubcep1                                                                                                                       | 10        | 2            | 1           |
| P62984    | RL40_MOUSE  | Uba52 Ubcep2                                                                                                                              | 12        | 2            | 1           |
| P63017    | HSP7C_MOUSE | Hspa8 Hsc70 Hsc73                                                                                                                         | 29        | 29,5         | 14          |
| P63260    | ACTG_MOUSE  | Actg1 Actg                                                                                                                                | 8         | 2            | 2           |
| P99027    | RLA2_MOUSE  | Rplp2                                                                                                                                     | 10        | 1            | 1           |
| Q01853    | TERA_MOUSE  | Vcp                                                                                                                                       | 3         | 1            | 1           |
| Q07797    | LG3BP_MOUSE | Lgals3bp Cypap Mama                                                                                                                       | 3         | 2            | 1           |
| Q3THE2    | ML12B_MOUSE | Myl12b Mr1c2 Mylc2b                                                                                                                       | 6         | 2            | 1           |
| Q60605    | MYL6_MOUSE  | Myh6 Myln                                                                                                                                 | 14        | 1,5          | 1,5         |
| Q64467    | G3PT_MOUSE  | Gapdhs Gapd-s Gapds                                                                                                                       | 3         | 1            | 1           |
| Q6NXX9    | K2C73_MOUSE | Krt73 Kb36                                                                                                                                | 4         | 2            | 2           |
| Q6URW6    | MYH14_MOUSE | Myh14                                                                                                                                     | 1         | 2,5          | 2           |
| Q6ZVV7    | RL35_MOUSE  | Rpl35                                                                                                                                     | 8         | 1            | 1           |
| Q8BMF4    | ODP2_MOUSE  | Dlat                                                                                                                                      | 3         | 1,5          | 1           |
| Q8CI43    | MYL6B_MOUSE | Myh6b                                                                                                                                     | 6         | 1            | 1           |
| Q8VDD5    | MYH9_MOUSE  | Myh9                                                                                                                                      | 11        | 19           | 14          |
| Q99KV1    | DJB11_MOUSE | Dnajb11                                                                                                                                   | 5         | 2            | 1,5         |
| Q9CZ8     | RS19_MOUSE  | Rps19                                                                                                                                     | 6         | 1            | 1           |
| Q9JIY5    | HTRA2_MOUSE | Htra2 Omi Prss25                                                                                                                          | 3         | 1            | 1           |

NRAS G12D TAP-LC-MSMS in Ba/F3 rtTA3 cells, 1st biological replicate

| UniProtID | Entry_name  | Gene_names                                                                             | AvgSeqCov | AvgSpecCount | AvgPepCount |
|-----------|-------------|----------------------------------------------------------------------------------------|-----------|--------------|-------------|
| O89023    | TPP1_MOUSE  | Tpp1 Cin2                                                                              | 15        | 6,5          | 5           |
| P01868    | IGHG1_MOUSE | Ighg1 Igh-4                                                                            | 28        | 6            | 5,5         |
| P01869    | IGH1M_MOUSE | Ighg1 Igh-4                                                                            | 23        | 6            | 5,5         |
| P05213    | TBA1B_MOUSE | Tuba1b Tuba2                                                                           | 38        | 17,5         | 12          |
| P08556    | RASN_MOUSE  | Nras                                                                                   | 67        | 137,5        | 13          |
| POCG49    | UBB_MOUSE   | Ubb                                                                                    | 21        | 3            | 1           |
| POCG50    | UBC_MOUSE   | Ubc                                                                                    | 20        | 3            | 1           |
| P10126    | EF1A1_MOUSE | Eef1a1 Eef1a                                                                           | 8         | 4            | 3           |
| P10518    | HEM2_MOUSE  | Alad Lv                                                                                | 5         | 1,5          | 1,5         |
| P11499    | HS90B_MOUSE | Hsp90ab1 Hsp84 Hsp84-1 Hspcb                                                           | 4         | 2            | 2           |
| P11983    | TCPA_MOUSE  | Tcp1 Cct1 Ccta                                                                         | 3         | 1,5          | 1,5         |
| P15864    | H12_MOUSE   | Hist1h1c H1f2                                                                          | 16        | 4            | 4           |
| P16858    | G3P_MOUSE   | Gapdh Gapd                                                                             | 14        | 5            | 3           |
| P18524    | HVM53_MOUSE |                                                                                        | 9         | 1            | 1           |
| P18526    | HVM55_MOUSE |                                                                                        | 9         | 1            | 1           |
| P21107    | TPM3_MOUSE  | Tpm3 Tpm-5 Tpm5                                                                        | 9         | 1            | 1           |
| P22752    | H2A1_MOUSE  | Hist1h2ab; Hist1h2ac; Hist1h2ad; Hist1h2ae; Hist1h2ag; Hist1h2ai; Hist1h2an; Hist1h2ao | 22        | 2,5          | 2           |
| P34884    | MIF_MOUSE   | Mif                                                                                    | 8         | 1            | 1           |
| P35700    | PRDX1_MOUSE | Prdx1 Msp23 Paga Tdpx2                                                                 | 5         | 1            | 1           |
| P43274    | H14_MOUSE   | Hist1h1e H1f4                                                                          | 15        | 3            | 3           |
| P43277    | H13_MOUSE   | Hist1h1d H1f3                                                                          | 15        | 4            | 4           |
| P48962    | ADT1_MOUSE  | Slc25a4 Anc1 Ant1                                                                      | 23        | 6            | 5           |
| P50446    | K2CGA_MOUSE | Krt6a Ker2 Krt2-6 Krt2-6a Krt6                                                         | 4         | 5            | 2           |
| P51881    | ADT2_MOUSE  | Slc25a5 Ant2                                                                           | 25        | 8            | 5,5         |
| P52480    | KPYM_MOUSE  | Pkm Pk3 Pkm2 Pykm                                                                      | 13        | 6,66666667   | 5,33333333  |
| P60710    | ACTB_MOUSE  | Actb                                                                                   | 15        | 7            | 4           |
| P61358    | RL27_MOUSE  | Rpl27                                                                                  | 7         | 2            | 1           |
| P61514    | RL37A_MOUSE | Rpl37a                                                                                 | 20        | 1            | 1           |
| P62267    | RS23_MOUSE  | Rps23                                                                                  | 8         | 1            | 1           |



|        |             |                                                                                                                                           |    |      |     |
|--------|-------------|-------------------------------------------------------------------------------------------------------------------------------------------|----|------|-----|
| P62751 | RL23A_MOUSE | Rpl23a                                                                                                                                    | 8  | 1    | 1   |
| P62806 | H4_MOUSE    | Hist1h4a; Hist1h4b H4-53; Hist1h4c H4-12; Hist1h4d; Hist1h4f; Hist1h4h; Hist1h4i; Hist1h4j; Hist1h4k; Hist1h4m; Hist2h4a Hist2h4; Hist4h4 | 12 | 1    | 1   |
| P62830 | RL23_MOUSE  | Rpl23                                                                                                                                     | 14 | 1    | 1   |
| P62852 | RS25_MOUSE  | Rps25                                                                                                                                     | 15 | 2    | 2   |
| P62900 | RL31_MOUSE  | Rpl31                                                                                                                                     | 11 | 1    | 1   |
| P62908 | RS3_MOUSE   | Rps3                                                                                                                                      | 11 | 2,5  | 2,5 |
| P62983 | RS27A_MOUSE | Rps27a Uba80 Ubcep1                                                                                                                       | 10 | 3    | 1   |
| P62984 | RL40_MOUSE  | Uba52 Ubcep2                                                                                                                              | 12 | 3    | 1   |
| P63017 | HSP7C_MOUSE | Hspa8 Hsc70 Hsc73                                                                                                                         | 27 | 19,5 | 13  |
| P63260 | ACTG_MOUSE  | Actg1 Actg                                                                                                                                | 15 | 7    | 4   |
| P67984 | RL22_MOUSE  | Rpl22                                                                                                                                     | 9  | 1    | 1   |
| P99024 | TB85_MOUSE  | Tubb5                                                                                                                                     | 10 | 3,5  | 3,5 |
| P99027 | RLA2_MOUSE  | Rplp2                                                                                                                                     | 18 | 1,5  | 1,5 |
| Q01853 | TERA_MOUSE  | Vcp                                                                                                                                       | 6  | 3,5  | 3,5 |
| Q03265 | ATPA_MOUSE  | Atp5a1                                                                                                                                    | 8  | 3    | 3   |
| Q05920 | PKC_MOUSE   | Pc Fkx                                                                                                                                    | 2  | 2    | 2   |
| Q07797 | LG3BP_MOUSE | Lgals3bp Cycap Mama                                                                                                                       | 10 | 4,5  | 3,5 |
| Q3TCN2 | PLBL2_MOUSE | Plibd2                                                                                                                                    | 2  | 1    | 1   |
| Q3THE2 | ML12B_MOUSE | Myl12b Mrlc2 Mylc2b                                                                                                                       | 24 | 3,5  | 3   |
| Q5SWU9 | ACACA_MOUSE | Acaca Acac Gm738                                                                                                                          | 2  | 5    | 5   |
| Q60605 | MYL6_MOUSE  | Myl6 Myln                                                                                                                                 | 30 | 7    | 4,5 |
| Q61414 | K1C15_MOUSE | Krt15 krt1-15                                                                                                                             | 4  | 2    | 2   |
| Q61781 | K1C14_MOUSE | Krt14 krt1-14                                                                                                                             | 4  | 2    | 2   |
| Q64523 | H2A2C_MOUSE | Hist2h2ac Hist2h2ab                                                                                                                       | 22 | 2,5  | 2   |
| Q6GS57 | H2A2A_MOUSE | Hist2h2aa1; Hist2h2aa2                                                                                                                    | 22 | 2,5  | 2   |
| Q6IFX2 | K1C42_MOUSE | Krt42 Ka22                                                                                                                                | 4  | 2    | 2   |
| Q6IME9 | K2C72_MOUSE | Krt72 Kb35 Krt72-ps                                                                                                                       | 2  | 3,5  | 1   |
| Q6NXX9 | K2C73_MOUSE | Krt73 Kb36                                                                                                                                | 4  | 8    | 2   |
| Q6URW6 | MYH14_MOUSE | Myh14                                                                                                                                     | 1  | 1,5  | 1,5 |
| Q791V5 | MTCH2_MOUSE | Mtch2                                                                                                                                     | 14 | 2,5  | 2,5 |
| Q8BFU2 | H2A3_MOUSE  | Hist3h2a                                                                                                                                  | 22 | 2,5  | 2   |
| Q8BGZ7 | K2C75_MOUSE | Krt75 Kb18                                                                                                                                | 5  | 6    | 2,5 |
| Q8BMF4 | ODP2_MOUSE  | Dlat                                                                                                                                      | 5  | 2,5  | 2   |
| Q8CGP5 | H2A1F_MOUSE | Hist1h2af                                                                                                                                 | 22 | 2,5  | 2   |
| Q8CGP6 | H2A1H_MOUSE | Hist1h2ah                                                                                                                                 | 22 | 2,5  | 2   |
| Q8CGP7 | H2A1K_MOUSE | Hist1h2ak                                                                                                                                 | 22 | 2,5  | 2   |
| Q8R1M2 | H2A1_MOUSE  | H2afj                                                                                                                                     | 22 | 2,5  | 2   |
| Q8VBV7 | CSN8_MOUSE  | Cops8 Csn8                                                                                                                                | 7  | 1    | 1   |
| Q8VDD5 | MYH9_MOUSE  | Myh9                                                                                                                                      | 22 | 49   | 34  |
| Q8VED5 | K2C79_MOUSE | Krt79 Kb38                                                                                                                                | 5  | 3    | 2   |
| Q912A3 | PCCA_MOUSE  | Pcca                                                                                                                                      | 4  | 2    | 2   |
| Q921Q7 | RIN1_MOUSE  | Rin1                                                                                                                                      | 15 | 9,5  | 7,5 |
| Q922U2 | K2C5_MOUSE  | Krt5 Krt2-5                                                                                                                               | 4  | 5    | 2   |
| Q99KV1 | DJB11_MOUSE | Dnajb11                                                                                                                                   | 8  | 2    | 2   |
| Q99KN9 | PCCB_MOUSE  | Pccb                                                                                                                                      | 7  | 4    | 3,5 |
| Q9C862 | M3OM1_MOUSE | Slc25a11                                                                                                                                  | 6  | 1,5  | 1,5 |
| Q9CKW4 | RL11_MOUSE  | Rpl11                                                                                                                                     | 8  | 1,5  | 1   |
| Q9CZ8  | RS19_MOUSE  | Rps19                                                                                                                                     | 14 | 2    | 2   |
| Q9DSY0 | CG031_MOUSE |                                                                                                                                           | 4  | 2    | 2   |
| Q9JHG7 | PK3CG_MOUSE | Pik3cg Pik3kg1                                                                                                                            | 4  | 4    | 3   |
| Q9JIY5 | HTRA2_MOUSE | Htra2 Omi Prss25                                                                                                                          | 6  | 2,5  | 2,5 |
| Q9JIJ8 | RL38_MOUSE  | Rpl38                                                                                                                                     | 17 | 1    | 1   |
| Q9QWL7 | K1C17_MOUSE | Krt17 krt1-17                                                                                                                             | 5  | 2    | 2   |
| Q9Z31  | K2C6B_MOUSE | Krt6b K6-beta Krt2-6b                                                                                                                     | 4  | 5    | 2   |

NRAS G12D TAP-LC-MS/MS in Ba/F3 rtTA3 cells, 2nd biological replicate

| UniProtID | Entry_name  | Gene_names                                                                                                                                | AvgSeqCov | AvgSpecCount | AvgPepCount |
|-----------|-------------|-------------------------------------------------------------------------------------------------------------------------------------------|-----------|--------------|-------------|
| O08638    | MYH11_MOUSE | Myh11                                                                                                                                     | 3         | 8            | 6           |
| O35658    | CIQBP_MOUSE | Ciqbp Gc1qbp                                                                                                                              | 5         | 1,5          | 1           |
| O54941    | SMCE1_MOUSE | Smarce1 Baf57                                                                                                                             | 3         | 1            | 1           |
| O89023    | TPP1_MOUSE  | Tpp1 Clin2                                                                                                                                | 15        | 7            | 5           |
| P01837    | IGKC_MOUSE  |                                                                                                                                           | 49        | 6,5          | 5           |
| P01868    | IGHG1_MOUSE | Ighg1 Igh-4                                                                                                                               | 39        | 28           | 8           |
| P01869    | IGHI1_MOUSE | Ighi1 Igh-4                                                                                                                               | 32        | 28           | 8           |
| P04104    | K2C1_MOUSE  | Krt1 Krt2-1                                                                                                                               | 5         | 6            | 4           |
| P05064    | ALDOA_MOUSE | Aldoa Aldo1                                                                                                                               | 8         | 3,5          | 3           |
| P05213    | TBA1B_MOUSE | Tuba1b Tuba2                                                                                                                              | 30        | 12,5         | 10          |
| P08556    | RASN_MOUSE  | Nras                                                                                                                                      | 64        | 140          | 11          |
| P08730    | K1C13_MOUSE | Krt13 Krt1-13                                                                                                                             | 8         | 4            | 4           |
| P09528    | FRIH_MOUSE  | Fth1 Fth                                                                                                                                  | 12        | 2,5          | 2,5         |
| P0CG49    | UBB_MOUSE   | Ubb                                                                                                                                       | 21        | 1            | 1           |
| P0CG50    | UBC_MOUSE   | Ubc                                                                                                                                       | 20        | 1            | 1           |
| P10126    | EF1A1_MOUSE | Eef1a1 Eef1a                                                                                                                              | 10        | 5            | 4           |
| P10518    | HEM2_MOUSE  | Alad Lv                                                                                                                                   | 3         | 1            | 1           |
| P11499    | HS90B_MOUSE | Hsp90ab1 Hsp84 Hsp84-1 Hspcb                                                                                                              | 5         | 4            | 3,5         |
| P11983    | TCF9_MOUSE  | Tcf9 Cct1 Ccta                                                                                                                            | 4         | 2            | 2           |
| P14115    | RL27A_MOUSE | Rpl27a                                                                                                                                    | 22        | 3            | 3           |
| P14131    | RS16_MOUSE  | Rps16                                                                                                                                     | 23        | 2            | 2           |
| P15864    | H12_MOUSE   | Hist1h1c H1f2                                                                                                                             | 16        | 5            | 4           |
| P16858    | G3P_MOUSE   | Gapdh Gapd                                                                                                                                | 11        | 3            | 2,5         |
| P17809    | GTR1_MOUSE  | Slc2a1 Glut-1 Glut1                                                                                                                       | 2         | 1            | 1           |
| P18524    | HVM53_MOUSE |                                                                                                                                           | 9         | 1,5          | 1           |
| P18526    | HVM55_MOUSE |                                                                                                                                           | 9         | 1,5          | 1           |
| P20029    | GRP78_MOUSE | Hspa5 Grp78                                                                                                                               | 8         | 5,5          | 4           |
| P21107    | TPM3_MOUSE  | Tpm3 Tpm-5 Tpm5                                                                                                                           | 23        | 8,5          | 7,5         |
| P22752    | H2A1_MOUSE  | Hist1h2ab; Hist1h2ac; Hist1h2ad; Hist1h2ae; Hist1h2ag; Hist1h2ai; Hist1h2an; Hist1h2ao                                                    | 22        | 2,5          | 2           |
| P29391    | FRL1_MOUSE  | Frl1 Frl Frl-1                                                                                                                            | 21        | 2            | 2           |
| P35700    | PRDX1_MOUSE | Prdx1 Msp23 Paga Tdpx2                                                                                                                    | 10        | 2            | 2           |
| P35979    | RL12_MOUSE  | Rpl12                                                                                                                                     | 10        | 1            | 1           |
| P38647    | GRP75_MOUSE | Hspa9 Grp75 Hsp74 Hspa9a                                                                                                                  | 4         | 2            | 2           |
| P43274    | H14_MOUSE   | Hist1h1e H1f4                                                                                                                             | 15        | 3            | 3           |
| P43277    | H13_MOUSE   | Hist1h1d H1f3                                                                                                                             | 15        | 5            | 4           |
| P50446    | K2C6A_MOUSE | Krt6a Ker2 Krt2-6 Krt2-6a Krt6                                                                                                            | 10        | 6,5          | 6           |
| P51881    | ADT2_MOUSE  | Slc25a5 Ant2                                                                                                                              | 25        | 7,5          | 6           |
| P52480    | KPYM_MOUSE  | Pkm Pk3 Pkm2 Pykm                                                                                                                         | 17        | 8,5          | 7           |
| P60710    | ACTB_MOUSE  | Actb                                                                                                                                      | 38        | 15           | 11          |
| P61358    | RL27_MOUSE  | Rpl27                                                                                                                                     | 28        | 3            | 3           |
| P61514    | RL37A_MOUSE | Rpl37a                                                                                                                                    | 20        | 1            | 1           |
| P61982    | 1433G_MOUSE | Ywhag                                                                                                                                     | 7         | 1,5          | 1,5         |
| P62267    | RS23_MOUSE  | Rps23                                                                                                                                     | 8         | 1            | 1           |
| P62270    | RS18_MOUSE  | Rps18                                                                                                                                     | 14        | 3            | 3           |
| P62274    | RS29_MOUSE  | Rps29                                                                                                                                     | 27        | 2            | 1,5         |
| P62281    | RS11_MOUSE  | Rps11                                                                                                                                     | 12        | 2            | 2           |
| P62301    | RS13_MOUSE  | Rps13                                                                                                                                     | 8         | 1            | 1           |
| P62702    | RS4X_MOUSE  | Rps4x Rps4                                                                                                                                | 16        | 4            | 4           |
| P62751    | RL23A_MOUSE | Rpl23a                                                                                                                                    | 28        | 6            | 6           |
| P62806    | H4_MOUSE    | Hist1h4a; Hist1h4b H4-53; Hist1h4c H4-12; Hist1h4d; Hist1h4f; Hist1h4h; Hist1h4i; Hist1h4j; Hist1h4k; Hist1h4m; Hist2h4a Hist2h4; Hist4h4 | 34        | 4,5          | 3,5         |
| P62830    | RL23_MOUSE  | Rpl23                                                                                                                                     | 23        | 2,5          | 2,5         |
| P62852    | RS25_MOUSE  | Rps25                                                                                                                                     | 19        | 2,5          | 2,5         |
| P62900    | RL31_MOUSE  | Rpl31                                                                                                                                     | 18        | 2,5          | 2,5         |
| P62908    | RS3_MOUSE   | Rps3                                                                                                                                      | 29        | 7            | 6,5         |
| P62960    | YBOX1_MOUSE | Ybx1 Msy-1 Msy1 Nsep1 Yb1                                                                                                                 | 5         | 1            | 1           |
| P62983    | RS27A_MOUSE | Rps27a Uba80 Ubcep1                                                                                                                       | 10        | 1            | 1           |
| P62984    | RL40_MOUSE  | Uba52 Ubcep2                                                                                                                              | 12        | 1            | 1           |
| P63017    | HSP7C_MOUSE | Hspa8 Hsc70 Hsc73                                                                                                                         | 34        | 23,5         | 17          |
| P63260    | ACTG_MOUSE  | Actg1 Actg                                                                                                                                | 35        | 15           | 10,5        |
| P63276    | RS17_MOUSE  | Rps17                                                                                                                                     | 9         | 1,5          | 1,5         |
| P67984    | RL22_MOUSE  | Rpl22                                                                                                                                     | 12        | 1            | 1           |
| P68033    | ACTC_MOUSE  | Actc1 Actc                                                                                                                                | 25        | 10           | 8           |
| P68040    | GBLP_MOUSE  | Gnb2l1 Gnb2-rs1                                                                                                                           | 6         | 2            | 2           |
| P68134    | ACTS_MOUSE  | Acta1 Acta                                                                                                                                | 25        | 10           | 8           |
| P68368    | TBA4A_MOUSE | Tuba4a Tuba4                                                                                                                              | 26        | 10,5         | 8,5         |
| P68372    | TBB4B_MOUSE | Tubb4b Tubb2c                                                                                                                             | 25        | 11           | 9           |
| P80318    | TCPG_MOUSE  | Cct3 Cctg                                                                                                                                 | 2         | 1            | 1           |
| P99024    | TB85_MOUSE  | Tubb5                                                                                                                                     | 23        | 10,5         | 8,5         |

|         |             |                        |    |      |      |
|---------|-------------|------------------------|----|------|------|
| P99027  | RLA2_MOUSE  | Rplp2                  | 55 | 5    | 4,5  |
| Q01768  | NDKB_MOUSE  | Nme2                   | 20 | 3,5  | 3    |
| Q01853  | TERA_MOUSE  | Vcp                    | 9  | 7    | 5,5  |
| Q03265  | ATPA_MOUSE  | Atp5a1                 | 7  | 3    | 3    |
| Q05920  | PYC_MOUSE   | Pc Pcx                 | 5  | 5    | 4,5  |
| Q07797  | LG3BP_MOUSE | Lgals3bp Cycop Mama    | 11 | 4    | 4    |
| Q3TCN2  | PLBL2_MOUSE | Pibd2                  | 2  | 1    | 1    |
| Q3THE2  | ML12B_MOUSE | Myli12b Mrlc2 Mylc2b   | 27 | 4    | 3,5  |
| Q49714  | KRT35_MOUSE | Krt35 Krt1-24          | 7  | 2    | 2    |
| Q5SWU9  | ACACA_MOUSE | Acaca Acac Gm738       | 7  | 13,5 | 13,5 |
| Q60605  | MYL6_MOUSE  | Myli6 Mylin            | 30 | 8,5  | 5    |
| Q61753  | SERA_MOUSE  | Phgdh                  | 7  | 3    | 3    |
| Q64523  | H2A2C_MOUSE | Hist2h2ac Hist2h2ab    | 22 | 2,5  | 2    |
| Q6G557  | H2A2A_MOUSE | Hist2h2aa1; Hist2h2aa2 | 22 | 2,5  | 2    |
| Q6IMH9  | K2C72_MOUSE | Krt72 Kb35 Krt72-ps    | 4  | 2,5  | 2    |
| Q6NKH9  | K2C73_MOUSE | Krt73 Kb36             | 6  | 5,5  | 3,5  |
| Q6JURW6 | MYH14_MOUSE | Myh14                  | 2  | 5,5  | 4,5  |
| Q6ZWIU9 | RS27_MOUSE  | Rps27                  | 28 | 2    | 2    |
| Q6ZVW7  | RL35_MOUSE  | Rpl35                  | 15 | 2    | 2    |
| Q6ZWY3  | RS27L_MOUSE | Rps27l                 | 28 | 2    | 2    |
| Q78IK2  | USMG5_MOUSE | Usmg5 Dapit            | 26 | 1    | 1    |
| Q791V5  | MTCH2_MOUSE | Mtch2                  | 17 | 4    | 3    |
| Q8BFU2  | H2A3_MOUSE  | Hist3h2a               | 22 | 2,5  | 2    |
| Q8BGZ7  | K2C75_MOUSE | Krt75 Kb18             | 8  | 4    | 4    |
| Q8BH59  | CMC1_MOUSE  | Slc25a12 Aralar1       | 4  | 2    | 2    |
| Q8BMF4  | ODP2_MOUSE  | Dlat                   | 6  | 3,5  | 2,5  |
| Q8CGP5  | H2A1F_MOUSE | Hist1h2af              | 22 | 2,5  | 2    |
| Q8CGP6  | H2A1H_MOUSE | Hist1h2ah              | 22 | 2,5  | 2    |
| Q8CGP7  | H2A1K_MOUSE | Hist1h2ak              | 22 | 2,5  | 2    |
| Q8R1M2  | H2AJ_MOUSE  | H2afj                  | 22 | 2,5  | 2    |
| Q8VBV7  | CSN8_MOUSE  | Cops8 Csn8             | 7  | 1    | 1    |
| Q8VDD5  | MYH9_MOUSE  | Myh9                   | 33 | 85,5 | 55   |
| Q8VED5  | K2C79_MOUSE | Krt79 Kb38             | 6  | 3    | 3    |
| Q8VEK3  | HNRPU_MOUSE | Hnrpu Hnrpu            | 2  | 1    | 1    |
| Q91VR2  | ATPG_MOUSE  | Atp5c1                 | 4  | 1,5  | 1    |
| Q91ZA3  | PCCA_MOUSE  | Pcca                   | 8  | 7    | 5    |
| Q921Q7  | RIN1_MOUSE  | Rin1                   | 18 | 11   | 10   |
| Q922B2  | SYDC_MOUSE  | Dars                   | 5  | 2    | 2    |
| Q99JR1  | SFXN1_MOUSE | Sfxn1 F                | 4  | 1    | 1    |
| Q99KP6  | PRP19_MOUSE | Prp19 Prp19 Snev       | 6  | 2    | 2    |
| Q99KQ4  | NAMPT_MOUSE | Nampt Pbel1            | 3  | 1    | 1    |
| Q99KV1  | DJB11_MOUSE | Dnajb11                | 12 | 3    | 3    |
| Q99MN1  | SYK_MOUSE   | Kars                   | 3  | 1,5  | 1,5  |
| Q99MN9  | PCCB_MOUSE  | Pccb                   | 13 | 6    | 5,5  |
| Q99NS7  | RAF1_MOUSE  | Raf1 Craf              | 9  | 4,5  | 4,5  |
| Q9CR62  | M2OM_MOUSE  | Slc25a11               | 6  | 1,5  | 1,5  |
| Q9CXW4  | RL11_MOUSE  | Rpl11                  | 8  | 1    | 1    |
| Q9CZ8   | RS19_MOUSE  | Rps19                  | 21 | 3,5  | 3,5  |
| Q9DCH4  | EIF3F_MOUSE | Eif3f Eif3s5           | 8  | 2    | 2    |
| Q9DCT5  | SDF2_MOUSE  | Sdf2                   | 16 | 2    | 1,5  |
| Q9ESP1  | SDF2L_MOUSE | Sdf2l                  | 17 | 3    | 2    |
| Q9JHG7  | PK3CG_MOUSE | Pik3cg Pik3g1          | 6  | 5,5  | 5,5  |
| Q9JIY5  | HTRA2_MOUSE | Htra2 Omi Prse25       | 5  | 2    | 2    |
| Q9JIZ2  | TBA8_MOUSE  | Tuba8                  | 22 | 10   | 7    |
| Q9JKB3  | YBOX3_MOUSE | Ybx3 Csd4 Msy4         | 5  | 1    | 1    |
| Q9QZD9  | EIF3I_MOUSE | Eif3i Eif3s2 Trip1     | 8  | 2,5  | 2    |
| Q9Z2C8  | YBOX2_MOUSE | Ybx2 Msy2              | 5  | 1    | 1    |

Supplementary Table 4

## Protein identification of GFP and MLKL S358D TAP-LC-MSMS in HT-29 RIEP cells

| Column       | Description                                           |
|--------------|-------------------------------------------------------|
| UniProtID    | UniprotKB ID                                          |
| Entry_name   | UniprotKB entry name                                  |
| Gene_names   | UniprotKB entry derived gene names                    |
| AvgSeqCov    | Average sequence coverage in two technical replicates |
| AvgSpecCount | Average spectral counts in two technical replicates   |
| AvgPepCount  | Average peptide counts in two technical replicates    |

## GFP TAP-LC-MSMS in HT-29 RIEP cells, 1st biological replicate

| UniProtID | Entry_name  | Gene_names                                    | AvgSeqCov | AvgSpecCount | AvgPepCount |
|-----------|-------------|-----------------------------------------------|-----------|--------------|-------------|
| A5A3E0    | POTEF_HUMAN | POTEF A26C1B                                  | 1         | 1            | 1           |
| O14773    | TPP1_HUMAN  | TPP1 CLN2 GIG1 UNQ267/PRO304                  | 3         | 1            | 1           |
| O43464    | HTRA2_HUMAN | HTRA2 OMI PRSS25                              | 6         | 2            | 2           |
| P02533    | K1C14_HUMAN | KRT14                                         | 6         | 3            | 3           |
| P02538    | K2C6A_HUMAN | KRT6A K6A KRT6D                               | 7         | 4            | 4           |
| P04259    | K2C6B_HUMAN | KRT6B K6B KRTL1                               | 7         | 4            | 4           |
| P04264    | K2C1_HUMAN  | KRT1 KRTA                                     | 15        | 9            | 8,5         |
| P05387    | RLA2_HUMAN  | RPLP2 D11S2243E RPP2                          | 17        | 1            | 1           |
| P05783    | K1C18_HUMAN | KRT18 CYK18 PIG46                             | 4         | 2            | 2           |
| P05787    | K2C8_HUMAN  | KRT8 CYK8                                     | 7         | 4            | 3,5         |
| P07437    | TBB5_HUMAN  | TUBB TUBB5 OK/SW-cl.56                        | 18        | 7            | 6,5         |
| P08107    | NA          | NA                                            | 24        | 34,5         | 11,5        |
| P0CG47    | UBB_HUMAN   | UBB                                           | 38        | 14           | 2           |
| P0CG48    | UBC_HUMAN   | UBC                                           | 38        | 14           | 2           |
| P11021    | GRP78_HUMAN | HSPA5 GRP78                                   | 21        | 26           | 9           |
| P11142    | HSP7C_HUMAN | HSPA8 HSC70 HSP73 HSPA10                      | 47        | 66,5         | 26          |
| P13645    | K1C10_HUMAN | KRT10 KPP                                     | 29        | 22           | 14,5        |
| P17066    | HSP76_HUMAN | HSPA6 HSP70B'                                 | 13        | 30,5         | 8           |
| P19013    | K2C4_HUMAN  | KRT4 CYK4                                     | 4         | 2            | 2           |
| P34931    | HS71L_HUMAN | HSPA1L                                        | 12        | 26,5         | 7,5         |
| P35908    | K22E_HUMAN  | KRT2 KRT2A KRT2E                              | 16        | 9,5          | 9,5         |
| P38646    | GRP75_HUMAN | HSPA9 GRP75 HSPA9B mt-HSP70                   | 17        | 8,5          | 8,5         |
| P48668    | K2C6C_HUMAN | KRT6C KRT6E                                   | 7         | 4            | 4           |
| P60709    | ACTB_HUMAN  | ACTB                                          | 5         | 1,5          | 1,5         |
| P62736    | ACTA_HUMAN  | ACTA2 ACTSA ACTVS GIG46                       | 5         | 1,5          | 1,5         |
| P62829    | RL23_HUMAN  | RPL23                                         | 14        | 8            | 1           |
| P62979    | RS27A_HUMAN | RPS27A UBA80 UBCEP1                           | 19        | 14           | 2           |
| P62987    | RL40_HUMAN  | UBA52 UBCEP2                                  | 23        | 14           | 2           |
| P63261    | ACTG_HUMAN  | ACTG1 ACTG                                    | 5         | 1,5          | 1,5         |
| P63267    | ACTH_HUMAN  | ACTG2 ACTA3 ACTL3 ACTSG                       | 5         | 1,5          | 1,5         |
| P68032    | ACTC_HUMAN  | ACTC1 ACTC                                    | 5         | 1,5          | 1,5         |
| P68104    | EF1A1_HUMAN | EEF1A1 EEF1A EF1A LENG7                       | 2         | 1            | 1           |
| P68133    | ACTS_HUMAN  | ACTA1 ACTA                                    | 5         | 1,5          | 1,5         |
| P68363    | TBA1B_HUMAN | TUBA1B                                        | 33        | 14,5         | 10          |
| P68366    | TBA4A_HUMAN | TUBA4A TUBA1                                  | 27        | 10           | 7,5         |
| P68371    | TBB4B_HUMAN | TUBB4B TUBB2C                                 | 10        | 5            | 4           |
| Q05639    | EF1A2_HUMAN | EEF1A2 EEF1AL STN                             | 2         | 1            | 1           |
| Q08380    | LG3BP_HUMAN | LGALS3BP M2BP                                 | 5         | 2            | 2           |
| Q562R1    | ACTBL_HUMAN | ACTBL2                                        | 5         | 1,5          | 1,5         |
| Q5VTE0    | EF1A3_HUMAN | EEF1A1P5 EEF1AL3                              | 2         | 1            | 1           |
| Q6S8J3    | POTEE_HUMAN | POTEE A26C1A POTE2                            | 1         | 1            | 1           |
| Q7Z5K2    | WAPL_HUMAN  | WAPAL FOE KIAA0261 WAPL                       | 3         | 2            | 2           |
| Q8IUS5    | EPHX4_HUMAN | EPHX4 ABHD7 EPHXRP                            | 12        | 2            | 2           |
| Q8NB16    | MLKL_HUMAN  | MLKL                                          | 4         | 2            | 2           |
| Q8WZ42    | TITIN_HUMAN | TTN                                           | 0         | 8            | 3           |
| Q9BQE3    | TBA1C_HUMAN | TUBA1C TUBA6                                  | 33        | 14,5         | 10          |
| Q9BVA1    | TBB2B_HUMAN | TUBB2B                                        | 11        | 4            | 4           |
| Q9BYX7    | ACTBM_HUMAN | POTEKP ACTBL3 FKSG30                          | 4         | 1            | 1           |
| Q9UBS4    | DJB11_HUMAN | DNAJB11 EDJ ERJ3 HDJ9 PSEC0121 UNQ537/PRO1080 | 8         | 2,5          | 2           |
| Q9Y572    | RIPK3_HUMAN | RIPK3 RIP3                                    | 8         | 4,5          | 2           |

## GFP TAP-LC-MSMS in HT-29 RIEP cells, 2nd biological replicate

| UniProtID | Entry_name  | Gene_names                            | AvgSeqCov | AvgSpecCount | AvgPepCount |
|-----------|-------------|---------------------------------------|-----------|--------------|-------------|
| O14773    | TPP1_HUMAN  | TPP1 CLN2 GIG1 UNQ267/PRO304          | 3         | 1,5          | 1           |
| O43464    | HTRA2_HUMAN | HTRA2 OMI PRSS25                      | 6         | 2            | 2           |
| O60271    | JIP4_HUMAN  | SPAG9 HSS KIAA0516 MAPK8IP4 SYD1 HLC6 | 1         | 1            | 1           |
| O95678    | K2C75_HUMAN | KRT75 K6HF KB18                       | 2         | 1            | 1           |
| O95816    | BAG2_HUMAN  | BAG2                                  | 5         | 1            | 1           |
| P02538    | K2C6A_HUMAN | KRT6A K6A KRT6D                       | 2         | 1            | 1           |
| P04259    | K2C6B_HUMAN | KRT6B K6B KRTL1                       | 2         | 1            | 1           |
| P04264    | K2C1_HUMAN  | KRT1 KRTA                             | 8         | 4            | 4           |
| P04792    | HSPB1_HUMAN | HSPB1 HSP27 HSP28                     | 5         | 1            | 1           |
| P05141    | ADT2_HUMAN  | SLC25A5 ANT2                          | 7         | 2            | 2           |

|        |             |                                               |    |             |     |
|--------|-------------|-----------------------------------------------|----|-------------|-----|
| P05387 | RLA2_HUMAN  | RPLP2 D11S2243E RPP2                          | 23 | 1,5         | 1,5 |
| P05787 | K2C8_HUMAN  | KRT8 CYK8                                     | 5  | 2,5         | 2,5 |
| P07437 | TBB5_HUMAN  | TUBB TUBB5 OK/SW-cl.56                        | 27 | 14          | 10  |
| P08107 | NA          | NA                                            | 31 | 41,33333333 | 14  |
| P08729 | K2C7_HUMAN  | KRT7 SCL                                      | 4  | 2           | 2   |
| P09972 | ALDOC_HUMAN | ALDOC ALDC                                    | 8  | 2           | 2   |
| POCG47 | UBB_HUMAN   | UBB                                           | 50 | 16          | 3   |
| POCG48 | UBC_HUMAN   | UBC                                           | 50 | 16          | 3   |
| P11021 | GRP78_HUMAN | HSPA5 GRP78                                   | 21 | 25          | 10  |
| P11142 | HSP7C_HUMAN | HSPA8 HSC70 HSP73 HSPA10                      | 49 | 80,5        | 28  |
| P12235 | ADT1_HUMAN  | SLC25A4 ANT1                                  | 7  | 2           | 2   |
| P12236 | ADT3_HUMAN  | SLC25A6 ANT3 CDABP0051                        | 7  | 2           | 2   |
| P13645 | K1C10_HUMAN | KRT10 KPP                                     | 7  | 4,5         | 3,5 |
| P13647 | K2C5_HUMAN  | KRT5                                          | 2  | 1           | 1   |
| P17066 | HSP76_HUMAN | HSPA6 HSP70B'                                 | 13 | 32          | 7,5 |
| P24534 | EF1B_HUMAN  | EEF1B2 EEF1B EF1B                             | 7  | 1           | 1   |
| P34931 | HS71L_HUMAN | HSPA1L                                        | 17 | 26          | 8,5 |
| P35527 | K1C9_HUMAN  | KRT9                                          | 3  | 2           | 2   |
| P35908 | K22E_HUMAN  | KRT2 KRT2A KRT2E                              | 2  | 1           | 1   |
| P38646 | GRP75_HUMAN | HSPA9 GRP75 HSPA9B mt-HSP70                   | 18 | 10          | 9   |
| P48668 | K2C6C_HUMAN | KRT6C KRT6E                                   | 2  | 1           | 1   |
| P55072 | TERA_HUMAN  | VCP                                           | 4  | 2           | 2   |
| P60709 | ACTB_HUMAN  | ACTB                                          | 11 | 3           | 3   |
| P61981 | 1433G_HUMAN | YWHAG                                         | 6  | 1           | 1   |
| P62829 | RL23_HUMAN  | RPL23                                         | 17 | 7,5         | 1,5 |
| P62979 | RS27A_HUMAN | RPS27A UBA80 UBCEP1                           | 24 | 16          | 3   |
| P62987 | RL40_HUMAN  | UBA52 UBCEP2                                  | 30 | 16          | 3   |
| P63261 | ACTG_HUMAN  | ACTG1 ACTG                                    | 11 | 3           | 3   |
| P68104 | EF1A1_HUMAN | EEF1A1 EEF1A EF1A LENG7                       | 3  | 1,5         | 1,5 |
| P68363 | TBA1B_HUMAN | TUBA1B                                        | 33 | 20,5        | 10  |
| P68366 | TBA4A_HUMAN | TUBA4A TUBA1                                  | 25 | 15,5        | 7   |
| P68371 | TBB4B_HUMAN | TUBB4B TUBB2C                                 | 20 | 11          | 8   |
| Q05639 | EF1A2_HUMAN | EEF1A2 EEF1A1 STN                             | 3  | 1,5         | 1,5 |
| Q5VTE0 | EF1A3_HUMAN | EEF1A1P5 EEF1A1L3                             | 3  | 1,5         | 1,5 |
| Q5XKE5 | K2C79_HUMAN | KRT79 K6L KB38 KRT6L                          | 2  | 1           | 1   |
| Q86X55 | CARM1_HUMAN | CARM1 PRMT4                                   | 4  | 2           | 2   |
| Q9BQE3 | TBA1C_HUMAN | TUBA1C TUBA6                                  | 33 | 19,5        | 10  |
| Q9BVA1 | TBB2B_HUMAN | TUBB2B                                        | 19 | 10          | 7   |
| Q9UBS4 | DJB11_HUMAN | DNAJB11 EDJ ERJ3 HDJ9 PSEC0121 UNQ537/PRO1080 | 8  | 2           | 2   |
| Q9UHV9 | PFD2_HUMAN  | PFDN2 PFD2 HSPC231                            | 9  | 1           | 1   |

**MLKL S358D TAP-LC-MSMS in HT-29 RIEP cells, 1st biological replicate**

| UniProtID | Entry_name  | Gene_names                    | AvgSeqCov | AvgSpecCount | AvgPepCount |
|-----------|-------------|-------------------------------|-----------|--------------|-------------|
| O00294    | TULP1_HUMAN | TULP1 TUBL1                   | 5         | 2            | 2           |
| O14773    | TPP1_HUMAN  | TPP1 CLN2 GIG1 UNQ267/PRO304  | 3         | 1            | 1           |
| O43464    | HTRA2_HUMAN | HTRA2 OMI PRSS25              | 3         | 1            | 1           |
| O60884    | DNJA2_HUMAN | DNAJA2 CPR3 HIRIP4            | 4         | 1            | 1           |
| P02533    | K1C14_HUMAN | KRT14                         | 13        | 5,5          | 5           |
| P02538    | K2C6A_HUMAN | KRT6A K6A KRT6D               | 7         | 4            | 3           |
| P04259    | K2C6B_HUMAN | KRT6B K6B KRTL1               | 5         | 3            | 2           |
| P04264    | K2C1_HUMAN  | KRT1 KRTA                     | 14        | 7,5          | 7           |
| P05141    | ADT2_HUMAN  | SLC25A5 ANT2                  | 4         | 1            | 1           |
| P05161    | ISG15_HUMAN | ISG15 G1P2 UCRP               | 12        | 1            | 1           |
| P05387    | RLA2_HUMAN  | RPLP2 D11S2243E RPP2          | 38        | 2,5          | 2           |
| P05787    | K2C8_HUMAN  | KRT8 CYK8                     | 4         | 2            | 2           |
| P07355    | ANXA2_HUMAN | ANXA2 ANX2 ANX2L4 CAL1H LPC2D | 6         | 1,5          | 1,5         |
| P07437    | TBB5_HUMAN  | TUBB TUBB5 OK/SW-cl.56        | 31        | 14,5         | 9,5         |
| P07900    | HS90A_HUMAN | HSP90AA1 HSP90A HSPC1 HSPCA   | 20        | 15,5         | 15          |
| P08107    | NA          | NA                            | 30        | 29,5         | 12,5        |
| P08238    | HS90B_HUMAN | HSP90AB1 HSP90B HSPC2 HSPCB   | 28        | 23,5         | 19,5        |
| P08708    | RS17_HUMAN  | RPS17 RPS17L                  | 25        | 2            | 2           |
| P08779    | K1C16_HUMAN | KRT16 KRT16A                  | 9         | 4,5          | 4           |
| POCG47    | UBB_HUMAN   | UBB                           | 21        | 4,5          | 1           |
| POCG48    | UBC_HUMAN   | UBC                           | 21        | 4,5          | 1           |
| POCW22    | RS17_HUMAN  | RPS17 RPS17L                  | 25        | 2            | 2           |
| P11021    | GRP78_HUMAN | HSPA5 GRP78                   | 9         | 18,5         | 4           |
| P11142    | HSP7C_HUMAN | HSPA8 HSC70 HSP73 HSPA10      | 45        | 57,5         | 23          |
| P12235    | ADT1_HUMAN  | SLC25A4 ANT1                  | 4         | 1            | 1           |
| P12236    | ADT3_HUMAN  | SLC25A6 ANT3 CDABP0051        | 4         | 1            | 1           |
| P13645    | K1C10_HUMAN | KRT10 KPP                     | 18        | 13,5         | 8           |
| P13647    | K2C5_HUMAN  | KRT5                          | 2         | 1            | 1           |
| P17066    | HSP76_HUMAN | HSPA6 HSP70B'                 | 13        | 24           | 7           |
| P19013    | K2C4_HUMAN  | KRT4 CYK4                     | 4         | 2,5          | 2           |
| P23396    | RS3_HUMAN   | RPS3 OK/SW-cl.26              | 5         | 1            | 1           |
| P30048    | PRDX3_HUMAN | PRDX3 AOP1                    | 10        | 2            | 2           |
| P34931    | HS71L_HUMAN | HSPA1L                        | 15        | 23           | 7           |
| P35030    | TRY3_HUMAN  | PRSS3 PRSS4 TRY3 TRY4         | 4         | 1            | 1           |

|        |             |                                               |    |      |             |
|--------|-------------|-----------------------------------------------|----|------|-------------|
| P35232 | PHB_HUMAN   | PHB                                           | 7  | 1    | 1           |
| P35527 | K1C9_HUMAN  | KRT9                                          | 11 | 4,5  | 4,5         |
| P35908 | K22E_HUMAN  | KRT2 KRT2A KRT2E                              | 4  | 3    | 2,5         |
| P38646 | GRP75_HUMAN | HSPA9 GRP75 HSPA9B mt-HSP70                   | 9  | 4,5  | 4,5         |
| P46782 | RS5_HUMAN   | RPS5                                          | 10 | 1    | 1           |
| P48668 | K2C6C_HUMAN | KRT6C KRT6E                                   | 7  | 4    | 3           |
| P51784 | UBP11_HUMAN | USP11 UHX1                                    | 1  | 1    | 1           |
| P52597 | HNRPF_HUMAN | HNRNPF HNRPF                                  | 6  | 1,5  | 1,5         |
| P54652 | HSP72_HUMAN | HSPA2                                         | 14 | 38   | 9           |
| P55072 | TERA_HUMAN  | VCP                                           | 6  | 3    | 3           |
| P61247 | RS3A_HUMAN  | RPS3A FTE1 MFTL                               | 6  | 1    | 1           |
| P61513 | RL37A_HUMAN | RPL37A                                        | 20 | 1    | 1           |
| P61978 | HNRPK_HUMAN | HNRNPK HNRPK                                  | 3  | 1    | 1           |
| P62249 | RS16_HUMAN  | RPS16                                         | 7  | 1    | 1           |
| P62280 | RS11_HUMAN  | RPS11                                         | 16 | 2    | 2           |
| P62829 | RL23_HUMAN  | RPL23                                         | 14 | 7,5  | 1           |
| P62854 | RS26_HUMAN  | RPS26                                         | 13 | 1    | 1           |
| P62913 | RL11_HUMAN  | RPL11                                         | 8  | 1    | 1           |
| P62979 | RS27A_HUMAN | RPS27A UBA80 UBCEP1                           | 10 | 4,5  | 1           |
| P62987 | RL40_HUMAN  | UBA52 UBCEP2                                  | 12 | 4,5  | 1           |
| P63208 | SKP1_HUMAN  | SKP1 EMC19 OCP2 SKP1A TCEB1L                  | 7  | 1    | 1           |
| P68104 | EF1A1_HUMAN | EEF1A1 EEF1A EF1A LENG7                       | 4  | 3,5  | 2           |
| P68363 | TBA1B_HUMAN | TUBA1B                                        | 34 | 13   | 10          |
| P68366 | TBA4A_HUMAN | TUBA4A TUBA1                                  | 25 | 8,5  | 7           |
| P68371 | TBB4B_HUMAN | TUBB4B TUBB2C                                 | 26 | 11,5 | 8,5         |
| Q05639 | EF1A2_HUMAN | EEF1A2 EEF1AL STN                             | 4  | 3,5  | 2           |
| Q06830 | PRDX1_HUMAN | PRDX1 PAGA PAGB TDPX2                         | 5  | 1    | 1           |
| Q08380 | LG3BP_HUMAN | LGALS3BP M2BP                                 | 7  | 2,5  | 2,5         |
| Q12931 | TRAP1_HUMAN | TRAP1 HSP75                                   | 2  | 1    | 1           |
| Q13085 | ACACA_HUMAN | ACACA ACAC ACC1 ACCA                          | 4  | 7    | 6,333333333 |
| Q14257 | RCN2_HUMAN  | RCN2 ERC55                                    | 8  | 1,5  | 1,5         |
| Q16543 | CDC37_HUMAN | CDC37 CDC37A                                  | 16 | 5    | 4           |
| Q58FF8 | H90B2_HUMAN | HSP90AB2P HSP90BB                             | 12 | 4    | 4           |
| Q5VTE0 | EF1A3_HUMAN | EEF1A1P5 EEF1AL3                              | 4  | 3,5  | 2           |
| Q8NB16 | MLKL_HUMAN  | MLKL                                          | 84 | 609  | 54,5        |
| Q8NCM8 | DYHC2_HUMAN | DYNC2H1 DHC1B DHC2 DNCH2 DYH1B KIAA1997       | 1  | 3    | 2           |
| Q92598 | HS105_HUMAN | HSPH1 HSP105 HSP110 KIAA0201                  | 7  | 4    | 4           |
| Q9H0C2 | ADT4_HUMAN  | SLC25A31 AAC4 ANT4 SFEC                       | 4  | 1    | 1           |
| Q9H254 | SPTN4_HUMAN | SPTBN4 KIAA1642 SPTBN3                        | 1  | 4    | 3           |
| Q9UBS4 | DJB11_HUMAN | DNAJB11 EDJ ERJ3 HDJ9 PSEC0121 UNQ537/PRO1080 | 8  | 4,5  | 2           |
| Q9Y572 | RIPK3_HUMAN | RIPK3 RIP3                                    | 38 | 19,5 | 12,5        |

**MLKL S358D TAP-LC-MSMS in HT-29 RIEP cells, 2nd biological replicate**

| UniProtID | Entry_name  | Gene_names                   | AvgSeqCov | AvgSpecCount | AvgPepCount |
|-----------|-------------|------------------------------|-----------|--------------|-------------|
| O14773    | TPP1_HUMAN  | TPP1 CLN2 GIG1 UNQ267/PRO304 | 3         | 1            | 1           |
| O43390    | HNRPR_HUMAN | HNRNPR HNRPR                 | 2         | 1            | 1           |
| P07437    | TBB5_HUMAN  | TUBB TUBB5 OK/SW-cl.56       | 13        | 8            | 4,5         |
| P07900    | HS90A_HUMAN | HSP90AA1 HSP90A HSPC1 HSPCA  | 12        | 10,5         | 9,5         |
| P08107    | NA          | NA                           | 19        | 28,5         | 7,5         |
| P08238    | HS90B_HUMAN | HSP90AB1 HSP90B HSPC2 HSPCB  | 16        | 14           | 11,5        |
| P0CG47    | UBB_HUMAN   | UBB                          | 21        | 6,5          | 1           |
| P0CG48    | UBC_HUMAN   | UBC                          | 21        | 6,5          | 1           |
| P11021    | GRP78_HUMAN | HSPA5 GRP78                  | 8         | 17           | 4           |
| P11142    | HSP7C_HUMAN | HSPA8 HSC70 HSP73 HSPA10     | 36        | 53,5         | 18          |
| P14618    | KPYM_HUMAN  | PKM OIP3 PK2 PK3 PKM2        | 2         | 1,5          | 1,5         |
| P17066    | HSP76_HUMAN | HSPA6 HSP70B'                | 10        | 26           | 5,5         |
| P30048    | PRDX3_HUMAN | PRDX3 AOP1                   | 5         | 1            | 1           |
| P34931    | HS71L_HUMAN | HSPA1L                       | 10        | 19,5         | 4,5         |
| P35030    | TRY3_HUMAN  | PRSS3 PRSS4 TRY3 TRY4        | 4         | 1            | 1           |
| P38646    | GRP75_HUMAN | HSPA9 GRP75 HSPA9B mt-HSP70  | 8         | 4            | 4           |
| P46782    | RS5_HUMAN   | RPS5                         | 10        | 1            | 1           |
| P52597    | HNRPF_HUMAN | HNRNPF HNRPF                 | 6         | 1,5          | 1,5         |
| P54652    | HSP72_HUMAN | HSPA2                        | 13        | 33           | 8           |
| P55072    | TERA_HUMAN  | VCP                          | 3         | 1,5          | 1,5         |
| P61247    | RS3A_HUMAN  | RPS3A FTE1 MFTL              | 6         | 1            | 1           |
| P61978    | HNRPK_HUMAN | HNRNPK HNRPK                 | 3         | 1            | 1           |
| P62829    | RL23_HUMAN  | RPL23                        | 14        | 11           | 1           |
| P62913    | RL11_HUMAN  | RPL11                        | 8         | 1            | 1           |
| P62979    | RS27A_HUMAN | RPS27A UBA80 UBCEP1          | 10        | 6,5          | 1           |
| P62987    | RL40_HUMAN  | UBA52 UBCEP2                 | 12        | 6,5          | 1           |
| P68363    | TBA1B_HUMAN | TUBA1B                       | 32        | 17           | 9,5         |
| P68366    | TBA4A_HUMAN | TUBA4A TUBA1                 | 22        | 8            | 6           |
| P68371    | TBB4B_HUMAN | TUBB4B TUBB2C                | 8         | 4,5          | 3           |
| Q06830    | PRDX1_HUMAN | PRDX1 PAGA PAGB TDPX2        | 5         | 1            | 1           |
| Q08380    | LG3BP_HUMAN | LGALS3BP M2BP                | 6         | 2            | 2           |
| Q12931    | TRAP1_HUMAN | TRAP1 HSP75                  | 2         | 1            | 1           |
| Q13085    | ACACA_HUMAN | ACACA ACAC ACC1 ACCA         | 1         | 2,5          | 2,5         |

|        |             |                                               |    |     |     |
|--------|-------------|-----------------------------------------------|----|-----|-----|
| Q14257 | RCN2_HUMAN  | RCN2 ERC55                                    | 8  | 1,5 | 1,5 |
| Q16543 | CDC37_HUMAN | CDC37 CDC37A                                  | 11 | 5,5 | 2,5 |
| Q5M9N0 | CD158_HUMAN | CCDC158                                       | 3  | 2   | 2   |
| Q8NB16 | MLKL_HUMAN  | MLKL                                          | 71 | 537 | 47  |
| Q92598 | HS105_HUMAN | HSPH1 HSP105 HSP110 KIAA0201                  | 6  | 4   | 4   |
| Q9UBS4 | DJB11_HUMAN | DNAJB11 EDJ ERJ3 HDJ9 PSEC0121 UNQ537/PRO1080 | 8  | 4   | 2   |
| Q9Y572 | RIPK3_HUMAN | RIPK3 RIP3                                    | 20 | 14  | 7   |
